# Supplementary material for: The Spatiotemporal Characteristics of 0 &ndash; 24 Goal Polo
Source: Preprints.org preprint supplement (doi:10.20944/preprints201907.0065.v1), 2019-07-03
Supplement: Supplementary file 1 [file supplementary]

**Table S1.** Effect sizes  $\pm$  90 % Confidence Intervals for mean distance (m) per chucka, compared at each level of play. Values are presented in **bold** if confidence interval does not cross zero. Magnitude of the effect is denoted by the following symbols \*: Small; # Moderate; †: Large; ‡: Very Large and is only provided for those effects whose confidence intervals do not cross zero.

| Comparison        | Speed Zone 1 |       |              | Speed Zone 2 |       |              | Speed Zone 3 |       |              | Speed Zone 4 |       |              | Speed Zone 5 |       |              |
|-------------------|--------------|-------|--------------|--------------|-------|--------------|--------------|-------|--------------|--------------|-------|--------------|--------------|-------|--------------|
| 0 goal – 6 goal   | <b>-0.44</b> | $\pm$ | <b>0.36*</b> | <b>0.42</b>  | $\pm$ | <b>0.36*</b> | 0.17         | $\pm$ | 0.36         | <b>-0.46</b> | $\pm$ | <b>0.37*</b> | <b>-0.49</b> | $\pm$ | <b>0.49*</b> |
| 0 goal – 10 goal  | -0.03        | $\pm$ | 0.31         | -0.03        | $\pm$ | 0.31         | -0.07        | $\pm$ | 0.32         | <b>-0.74</b> | $\pm$ | <b>0.33#</b> | <b>-0.58</b> | $\pm$ | <b>0.31*</b> |
| 0 goal – 16 goal  | <b>-0.97</b> | $\pm$ | <b>0.30#</b> | <b>1.05</b>  | $\pm$ | <b>0.30#</b> | <b>0.60</b>  | $\pm$ | <b>0.29#</b> | <b>-1.40</b> | $\pm$ | <b>0.31†</b> | <b>-0.83</b> | $\pm$ | <b>0.30#</b> |
| 0 goal – 24 goal  | <b>-0.77</b> | $\pm$ | <b>0.43#</b> | -0.23        | $\pm$ | 0.42         | <b>-0.65</b> | $\pm$ | <b>0.43#</b> | <b>-2.05</b> | $\pm$ | <b>0.51‡</b> | <b>-2.10</b> | $\pm$ | <b>0.52‡</b> |
| 6 goal – 10 goal  | 0.26         | $\pm$ | 0.31         | <b>-0.56</b> | $\pm$ | <b>0.32*</b> | <b>-0.33</b> | $\pm$ | <b>0.32*</b> | -0.27        | $\pm$ | 0.31         | -0.08        | $\pm$ | 0.31         |
| 6 goal – 16 goal  | <b>-0.85</b> | $\pm$ | <b>0.30#</b> | <b>0.74</b>  | $\pm$ | <b>0.30#</b> | <b>0.47</b>  | $\pm$ | <b>0.29*</b> | <b>-1.03</b> | $\pm$ | <b>0.30#</b> | <b>-0.51</b> | $\pm$ | <b>0.29*</b> |
| 6 goal – 24 goal  | <b>-0.79</b> | $\pm$ | <b>0.43#</b> | <b>-0.71</b> | $\pm$ | <b>0.44#</b> | <b>-1.07</b> | $\pm$ | <b>0.45#</b> | <b>-1.53</b> | $\pm$ | <b>0.47†</b> | <b>-1.36</b> | $\pm$ | <b>0.47†</b> |
| 10 goal – 16 goal | <b>-1.00</b> | $\pm$ | <b>0.24#</b> | <b>-1.18</b> | $\pm$ | <b>0.24#</b> | <b>0.78</b>  | $\pm$ | <b>0.24*</b> | <b>-0.86</b> | $\pm$ | <b>0.23*</b> | <b>-0.49</b> | $\pm$ | <b>0.22*</b> |
| 10 goal – 24 goal | <b>-0.59</b> | $\pm$ | <b>0.39*</b> | -0.26        | $\pm$ | 0.38         | <b>-0.95</b> | $\pm$ | <b>0.40#</b> | <b>-1.35</b> | $\pm$ | <b>0.42†</b> | <b>-1.47</b> | $\pm$ | <b>0.41†</b> |
| 16 goal – 24 goal | <b>0.59</b>  | $\pm$ | <b>0.37*</b> | <b>-1.23</b> | $\pm$ | <b>0.37†</b> | <b>-1.38</b> | $\pm$ | <b>0.38†</b> | -0.24        | $\pm$ | 0.37         | <b>-0.64</b> | $\pm$ | <b>0.36#</b> |

**Table S2.** Effect sizes  $\pm$  90 % Confidence Intervals for mean time (min:s) in speed zone per chukka, compared at each level of play. Values are presented in **bold** if confidence interval does not cross zero. Magnitude of the effect is denoted by the following symbols \*: Small; # Moderate; †: Large; ‡: Very Large and is only provided for those effects whose confidence intervals do not cross zero.

| Comparison        | Speed Zone 1 |       |              | Speed Zone 2 |       |              | Speed Zone 3 |       |              | Speed Zone 4 |       |              | Speed Zone 5 |       |              |
|-------------------|--------------|-------|--------------|--------------|-------|--------------|--------------|-------|--------------|--------------|-------|--------------|--------------|-------|--------------|
| 0 goal – 6 goal   | 0.06         | $\pm$ | 0.35         | <b>0.39</b>  | $\pm$ | <b>0.36*</b> | 0.22         | $\pm$ | 0.36         | <b>-0.46</b> | $\pm$ | <b>0.36*</b> | <b>-0.49</b> | $\pm$ | <b>0.36*</b> |
| 0 goal – 10 goal  | <b>0.37</b>  | $\pm$ | <b>0.31*</b> | -0.05        | $\pm$ | 0.31         | -0.05        | $\pm$ | 0.31         | <b>-0.74</b> | $\pm$ | <b>0.32#</b> | <b>-0.58</b> | $\pm$ | <b>0.32*</b> |
| 0 goal – 16 goal  | -0.09        | $\pm$ | 0.28         | <b>1.06</b>  | $\pm$ | <b>0.30#</b> | <b>0.60</b>  | $\pm$ | <b>0.29#</b> | <b>-1.39</b> | $\pm$ | <b>0.31†</b> | <b>-0.84</b> | $\pm$ | <b>0.30#</b> |
| 0 goal – 24 goal  | -0.16        | $\pm$ | 0.42         | -0.17        | $\pm$ | 0.42         | <b>-0.62</b> | $\pm$ | <b>0.43#</b> | <b>-2.01</b> | $\pm$ | <b>0.51‡</b> | <b>-2.17</b> | $\pm$ | <b>0.59‡</b> |
| 6 goal – 10 goal  | -0.30        | $\pm$ | 0.31         | <b>-0.54</b> | $\pm$ | <b>0.31*</b> | <b>-0.37</b> | $\pm$ | <b>0.32*</b> | -0.27        | $\pm$ | 0.32         | -0.08        | $\pm$ | 0.31         |
| 6 goal – 16 goal  | -0.14        | $\pm$ | 0.29         | <b>0.79</b>  | $\pm$ | <b>0.29#</b> | <b>0.42</b>  | $\pm$ | <b>0.29*</b> | <b>-1.08</b> | $\pm$ | <b>0.30#</b> | <b>-0.52</b> | $\pm$ | <b>0.29*</b> |
| 6 goal – 24 goal  | -0.22        | $\pm$ | 0.42         | <b>-0.63</b> | $\pm$ | <b>0.43#</b> | <b>-1.08</b> | $\pm$ | <b>0.45#</b> | <b>-1.51</b> | $\pm$ | <b>0.47†</b> | <b>-1.40</b> | $\pm$ | <b>0.46†</b> |
| 10 goal – 16 goal | <b>-0.43</b> | $\pm$ | <b>0.23*</b> | <b>1.20</b>  | $\pm$ | <b>0.24†</b> | <b>0.76</b>  | $\pm$ | <b>0.23#</b> | <b>-0.94</b> | $\pm$ | <b>0.23#</b> | <b>-0.50</b> | $\pm$ | <b>0.22*</b> |
| 10 goal – 24 goal | <b>-0.58</b> | $\pm$ | <b>0.39*</b> | -0.17        | $\pm$ | 0.39         | <b>-0.92</b> | $\pm$ | <b>0.39#</b> | <b>-1.33</b> | $\pm$ | <b>0.41†</b> | <b>-1.51</b> | $\pm$ | <b>0.42†</b> |
| 16 goal – 24 goal | -0.06        | $\pm$ | 0.36         | <b>-1.19</b> | $\pm$ | <b>0.37#</b> | <b>-1.37</b> | $\pm$ | <b>0.39†</b> | -0.03        | $\pm$ | 0.36         | <b>-0.65</b> | $\pm$ | <b>0.36#</b> |

**Table S3.** Effect sizes  $\pm$  90 % Confidence Intervals for mean high intensity activities per chukka, compared at each level of play. Values are presented in **bold** if confidence interval does not cross zero. Magnitude of the effect is denoted by the following symbols \*: Small; # Moderate; †: Large; ‡: Very Large and is only provided for those effects whose confidence intervals do not cross zero.

| Comparison        | Sprints      |       |              | Accelerations |       |              | Decelerations |       |              | Impacts      |       |              |
|-------------------|--------------|-------|--------------|---------------|-------|--------------|---------------|-------|--------------|--------------|-------|--------------|
| 0 goal – 6 goal   | 0.33         | $\pm$ | 0.36         | 0.17          | $\pm$ | 0.36         | 0.01          | $\pm$ | 0.36         | -0.32        | $\pm$ | 0.36         |
| 0 goal – 10 goal  | -0.18        | $\pm$ | 0.31         | 0.30          | $\pm$ | 0.31         | <b>-0.39</b>  | $\pm$ | <b>0.32*</b> | -0.24        | $\pm$ | 0.31         |
| 0 goal – 16 goal  | <b>-0.49</b> | $\pm$ | <b>0.29*</b> | <b>-0.72</b>  | $\pm$ | <b>0.72#</b> | <b>-0.81</b>  | $\pm$ | <b>0.30#</b> | <b>-0.49</b> | $\pm$ | <b>0.29*</b> |
| 0 goal – 24 goal  | <b>-0.90</b> | $\pm$ | <b>0.44#</b> | -0.09         | $\pm$ | 0.43         | <b>-1.18</b>  | $\pm$ | <b>0.45#</b> | <b>-0.97</b> | $\pm$ | <b>0.44#</b> |
| 6 goal – 10 goal  | <b>-0.55</b> | $\pm$ | <b>0.31*</b> | 0.08          | $\pm$ | 0.32         | <b>-0.37</b>  | $\pm$ | <b>0.32*</b> | 0.17         | $\pm$ | 0.32         |
| 6 goal – 16 goal  | <b>-0.85</b> | $\pm$ | <b>0.30#</b> | <b>-0.94</b>  | $\pm$ | <b>0.30#</b> | <b>-0.80</b>  | $\pm$ | <b>0.29#</b> | -0.23        | $\pm$ | 0.29         |
| 6 goal – 24 goal  | <b>-1.24</b> | $\pm$ | <b>0.23†</b> | -0.29         | $\pm$ | 0.43         | <b>-1.10</b>  | $\pm$ | <b>0.45#</b> | -0.28        | $\pm$ | 0.42         |
| 10 goal – 16 goal | <b>-0.32</b> | $\pm$ | <b>0.23*</b> | <b>-1.13</b>  | $\pm$ | <b>0.24#</b> | <b>-0.53</b>  | $\pm$ | <b>0.23*</b> | <b>-0.39</b> | $\pm$ | <b>0.23*</b> |
| 10 goal – 24 goal | <b>-0.83</b> | $\pm$ | <b>0.40#</b> | <b>-0.50</b>  | $\pm$ | <b>0.39*</b> | <b>-0.99</b>  | $\pm$ | <b>0.40#</b> | <b>-0.64</b> | $\pm$ | <b>0.35#</b> |
| 16 goal – 24 goal | <b>-0.49</b> | $\pm$ | <b>0.37*</b> | <b>0.68</b>   | $\pm$ | <b>0.37#</b> | -0.33         | $\pm$ | 0.36         | 0.00         | $\pm$ | 0.36         |
